# Supplementary material for: Hypocholesterolemic Effect of Blackcurrant (Ribes nigrum) Extract in Healthy Female Subjects: A Pilot Study
Source: MDPI journal article supplement (doi:10.3390/molecules26134085), 2021-07-04
Supplement: s1 [file s1]

# Hypocholesterolemic Effect of Blackcurrant (*Ribes nigrum*) Extract in Healthy Female Subjects: A Pilot Study

Naoki Nanashima <sup>1\*</sup>, Kayo Horie <sup>1</sup>, Maiko Kitajima <sup>2</sup>, Shizuka Takamagi <sup>2</sup>, Kasumi Mikami <sup>2</sup>, Naoya In <sup>2</sup> and Toshiko Tomisawa <sup>2\*</sup>

<sup>1</sup> Department of Bioscience and Laboratory Medicine, Hirosaki University Graduate School of Health Sciences, Hirosaki, Japan; nnaoki@hirosaki-u.ac.jp (N.N.); k-horie@hirosaki-u.ac.jp (K.H.)

<sup>2</sup> Department of Nursing Sciences, Hirosaki University Graduate School of Health Sciences, 66-1 Hon-cho, Hirosaki, Aomori 036-8564, Japan; kitajima@hirosaki-u.ac.jp (M.K.); takamagi@hirosaki-u.ac.jp (S.T.); k-mikami@hirosaki-u.ac.jp (K.M.); in1105@hirosaki-u.ac.jp (N.I.); tmtott@hirosaki-u.ac.jp (T.T.)

\* Correspondence: nnaoki@hirosaki-u.ac.jp (N.N.); tmtott@hirosaki-u.ac.jp (T.T.)

**Table S1.** Triglyceride concentration in the major classes of lipoproteins.

| Classes | 0 day (mg/dL) | 4 days (mg/dL) | 29 days (mg/dL) |
|---------|---------------|----------------|-----------------|
| CM      | 3.20 ± 2.7    | 4.64 ± 7.0     | 6.32 ± 9.2      |
| VLDL    | 45.1 ± 32.7   | 45.9 ± 46.0    | 44.0 ± 41.9     |
| LDL     | 17.9 ± 3.79   | 16.3 ± 3.7     | 16.6 ± 3.4      |
| HDL     | 13.0 ± 3.8    | 11.4 ± 4.9     | 11.6 ± 5.1      |

Data represent the means ± SD for 12 individuals.

**Table S2.** Triglyceride concentration in lipoprotein subclasses.

| Subclasses     | 0 day (mg/dL) | 4 days (mg/dL) | 29 days (mg/dL) |
|----------------|---------------|----------------|-----------------|
| Large VLDL     | 30.1 ± 25.5   | 32.7 ± 39.4    | 31.1 ± 35.6     |
| Medium VLDL    | 10.7 ± 5.2    | 9.23 ± 4.9     | 9.04 ± 4.7      |
| Small VLDL     | 4.32 ± 1.2    | 3.99 ± 1.2     | 3.86 ± 1.1      |
| Large LDL      | 6.60 ± 1.3    | 6.10 ± 1.4     | 6.01 ± 1.3      |
| Medium LDL     | 6.58 ± 1.3    | 6.03 ± 1.2     | 6.35 ± 1.2      |
| Small LDL      | 3.08 ± 1.3    | 2.72 ± 0.7     | 2.86 ± 0.6      |
| Very small LDL | 1.68 ± 0.7    | 1.49 ± 0.5     | 1.39 ± 0.5      |
| Very large HDL | 1.12 ± 0.6    | 0.92 ± 0.4     | 1.04 ± 0.4      |
| Large HDL      | 4.25 ± 1.7    | 3.44 ± 1.1     | 3.75 ± 1.2      |
| Medium HDL     | 4.21 ± 1.3    | 3.74 ± 1.9     | 3.90 ± 2.0      |
| Small HDL      | 2.17 ± 0.7    | 2.09 ± 1.2     | 1.86 ± 1.1      |
| Very small HDL | 1.28 ± 0.4    | 1.24 ± 0.6     | 1.05 ± 0.5      |

Data represent the means ± SD for 12 individuals.
